# Supplementary material for: Evolution of organic carbon in the laboratory oxidation of biomass-burning emissions
Source: Copernicus journal article supplement (doi:10.5194/acp-23-7887-2023), 2023-07-17
Supplement: Supplementary file 1 [file acp-23-7887-2023-supplement.pdf]

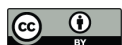

*Supplement of*

## **Evolution of organic carbon in the laboratory oxidation of biomass-burning emissions**

**Kevin J. Nihill et al.**

*Correspondence to:* Kevin J. Nihill ([kevin.j.nihill@gmail.com](mailto:kevin.j.nihill@gmail.com)) and Jesse H. Kroll ([jhkroll@mit.edu](mailto:jhkroll@mit.edu))

The copyright of individual parts of the supplement might differ from the article licence.

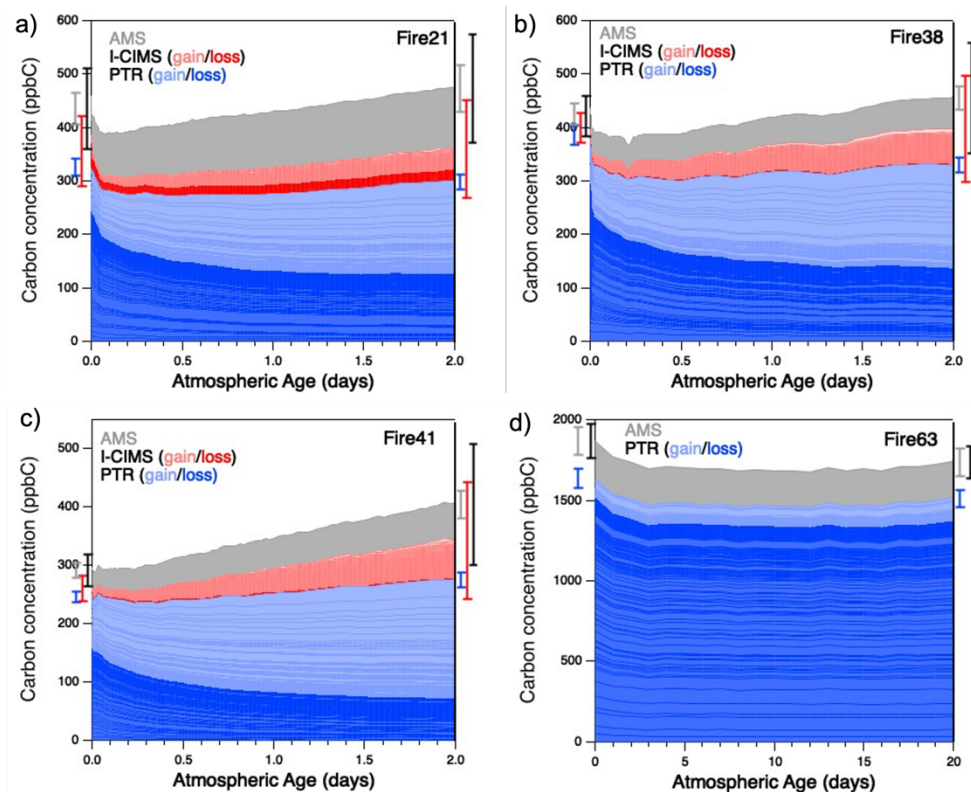

27  
 28 **Figure S1.** Measured carbon in the oxidation of emissions from (a) Fire 21 / Lodgepole Pine, litter, (b) Fire 38 /  
 29 Ponderosa Pine, litter, (c) Fire 41 / Lodgepole Pine, litter, and (d) Fire 63 / blank – no UV – for Lodgepole Pine, litter.  
 30 Measurements are separated into individual bands according to the instrument by which they were detected. Gas-  
 31 phase measurements are separated further: blue traces represent species measured by the PTR that are primarily  
 32 consumed (dark) or formed (light), ranked in order of largest decay (bottom) to largest increase (top); red traces follow  
 33 the same convention, but for the I-CIMS. Fire 63 does not include I-CIMS data. The gray trace represents SOA  
 34 measurements made by the AMS. The uncertainty ( $1\sigma$ , representing calibration uncertainties only) for each instrument  
 35 is shown to the left and right of the plot, corresponding to uncertainty before and after atmospheric aging, with total  
 36 uncertainty (black error bar) calculated by adding together individual uncertainties in quadrature.  
 37

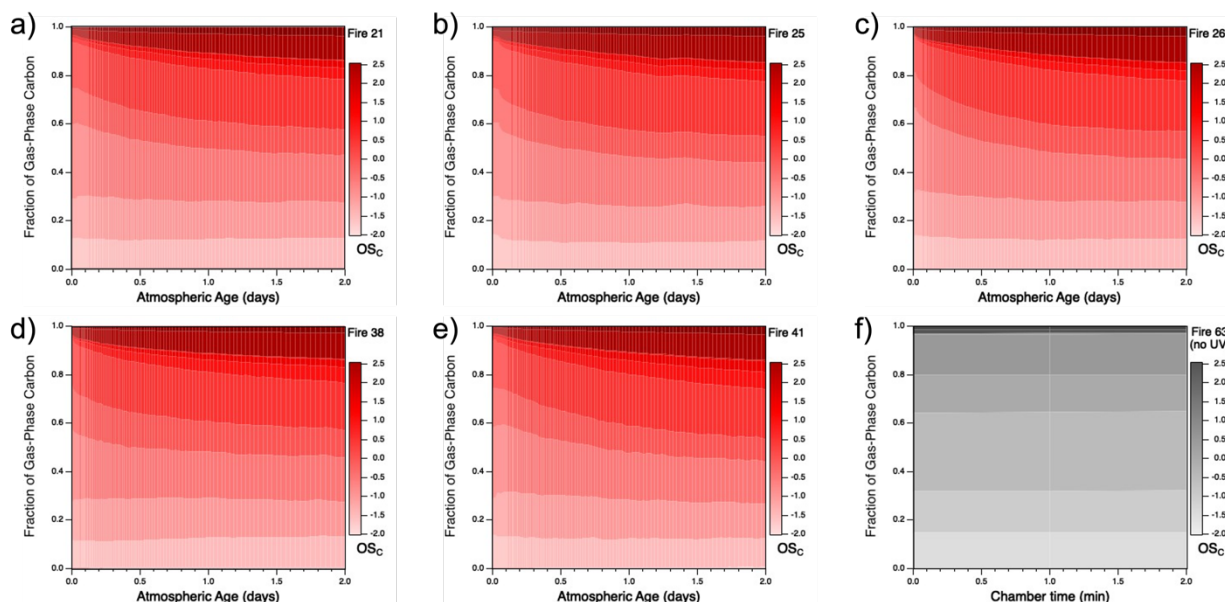

38  
 39 **Figure S2.** Time-evolving distribution of average carbon oxidation state ( $\overline{OS}_C$ ) for gas-phase BB emissions from each  
 40 of the different fuels as a function of atmospheric age (or chamber time for the blank): (a) Fire 21 / Lodgepole Pine,  
 41 litter, (b) Fire 25 / Engelmann Spruce, canopy, (c) Fire 26 / Engelmann Spruce, duff, (d) Fire 38 / Ponderosa Pine,  
 42 litter, (e) Fire 41 / Lodgepole Pine, litter, and (f) Fire 63 / blank – no UV – for Lodgepole Pine, litter. Gas-phase data  
 43 represented includes both PTR-MS and I-CIMS measurements, except for Fire 63, for which I-CIMS data is  
 44 unavailable.  
 45

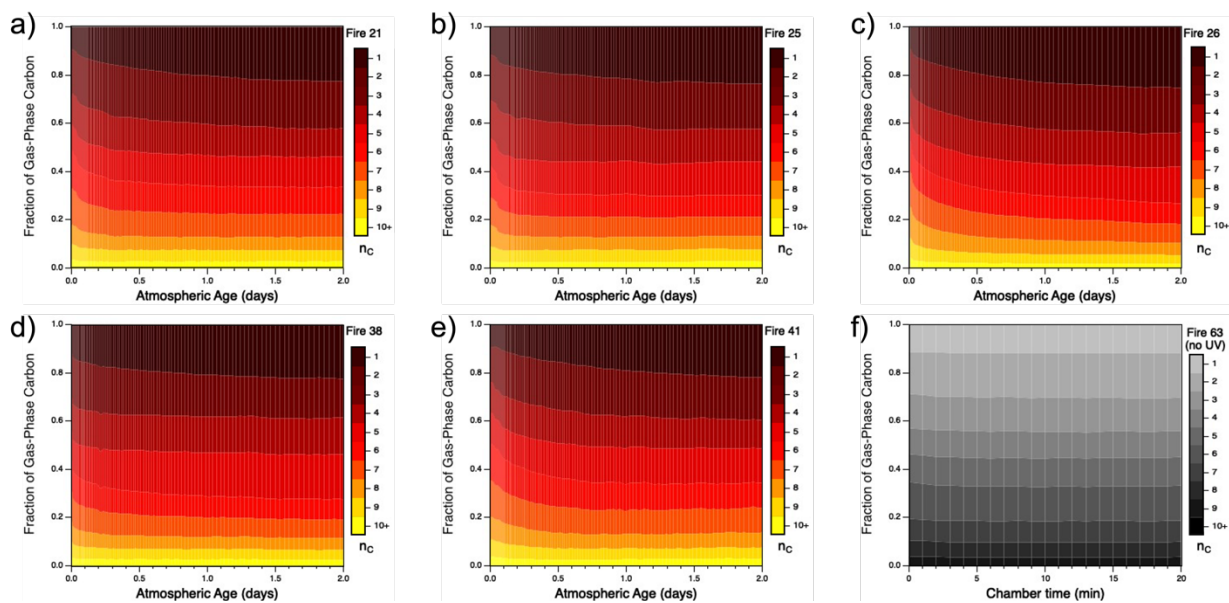

46  
 47 **Figure S3.** Time-evolving distribution of average carbon number ( $n_C$ ) for gas-phase BB emissions from each of the  
 48 different fuels as a function of atmospheric age (or chamber time for the blank): (a) Fire 21 / Lodgepole Pine, litter,  
 49 (b) Fire 25 / Engelmann Spruce, canopy, (c) Fire 26 / Engelmann Spruce, duff, (d) Fire 38 / Ponderosa Pine, litter, (e)  
 50 Fire 41 / Lodgepole Pine, litter, and (f) Fire 63 / blank – no UV – for Lodgepole Pine, litter. Gas-phase data represented  
 51 includes both PTR-MS and I-CIMS measurements, except for Fire 63, for which I-CIMS data is unavailable.  
 52

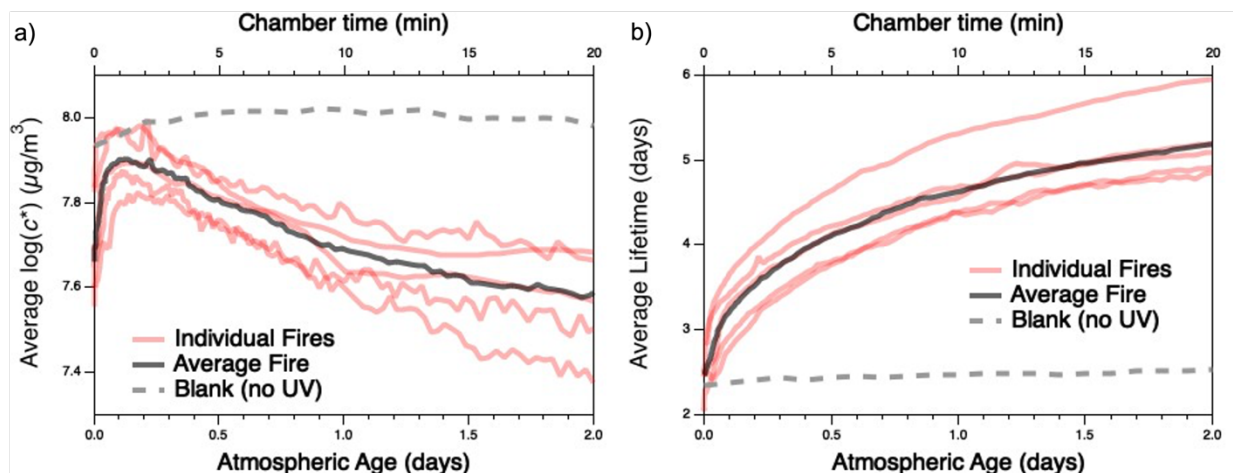54  
55

56 **Figure S4.** Evolution of (a) mean log of volatility ( $\bar{c}^*$ ) and (b) mean oxidative lifetime ( $\bar{\tau}_{\text{OH}}$ ) for the measured gas-  
 57 phase species, as a function of atmospheric aging (or chamber time for the blank experiment). Red lines represent  
 58 individual fires; gray dashed lines represent the blank run, for which only PTR data is used; black line denotes the  
 59 average of all burns studied, as described in the text. Traces for individual fires are derived from the evolution of each  
 60 fire's gas-phase distribution, as shown in Figs. S5-6. Values of  $\bar{c}^*$  and  $\bar{\tau}_{\text{OH}}$  for unidentified species are assigned using  
 61 structure-activity relationships.(Daumit et al., 2013; Donahue et al., 2013) Due to our inability to determine the  
 62 functionality of N atoms in unidentified species, N is not considered in the equation for  $\bar{c}^*$ .

63

64 Oxidative lifetime increases with oxidation, largely due to the formation of a few long-lived species (e.g.,  
 65 formic acid, formaldehyde, and acetaldehyde). Volatility first spikes somewhat and then slowly decreases over the  
 66 course of the experiment. This observation is likely driven by the fact that the average gas-phase carbon number,  $n_C$ ,  
 67 rapidly decreases during the first  $\sim 0.5$  days of atmospheric oxidation, whereas the average gas-phase oxidation state,  
 68  $OS_C$ , more gradually increases throughout the course of the reaction. Combined, these phenomena result in a quick  
 69 rise in volatility (as many low- $n_C$  compounds are formed in a short interval) followed by a more gradual decay (as the  
 70 gas-phase mixture is steadily oxidized while the carbon number remains relatively constant).

71 These trends are somewhat different from those observed for  $\alpha$ -pinene (Isaacman-VanWertz et al., 2018).  
 72 This difference is likely attributable to several factors. First, our study does not account for some notable classes of  
 73 compounds such as CO and organic aerosol (OA), which can affect both of these metrics. Additionally, the starting  
 74 materials in these two studies are rather different – our work begins with a complex mixture of reactive organic  
 75 compounds with varying levels of oxidation, whereas the study of  $\alpha$ -pinene begins with one precursor whose product  
 76 distribution becomes more complex over time.

77

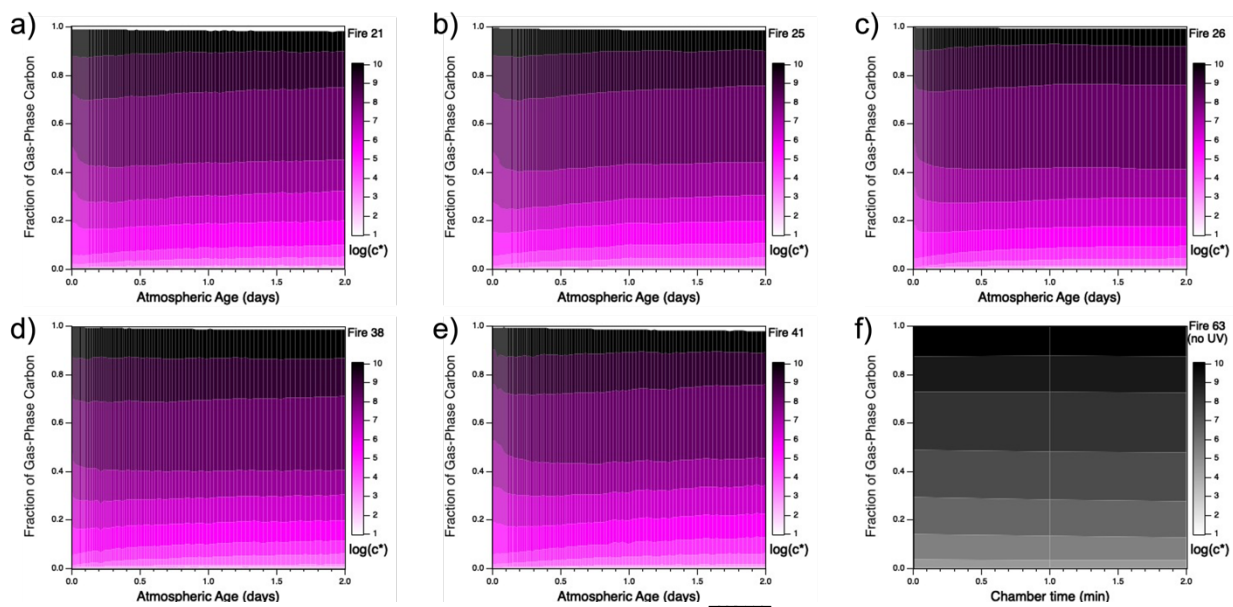

78  
 79 **Figure S5.** Time-evolving distribution of average vapor pressure ( $\log c^*$ ) for gas-phase BB emissions from each of  
 80 the different fuels as a function of atmospheric age (or chamber time for the blank): (a) Fire 21 / Lodgepole Pine, litter,  
 81 (b) Fire 25 / Engelmann Spruce, canopy, (c) Fire 26 / Engelmann Spruce, duff, (d) Fire 38 / Ponderosa Pine, litter, (e)  
 82 Fire 41 / Lodgepole Pine, litter, and (f) Fire 63 / blank – no UV – for Lodgepole Pine, litter.. Gas-phase data  
 83 represented includes both PTR-MS and I-CIMS measurements, except for Fire 63, for which I-CIMS data is  
 84 unavailable.

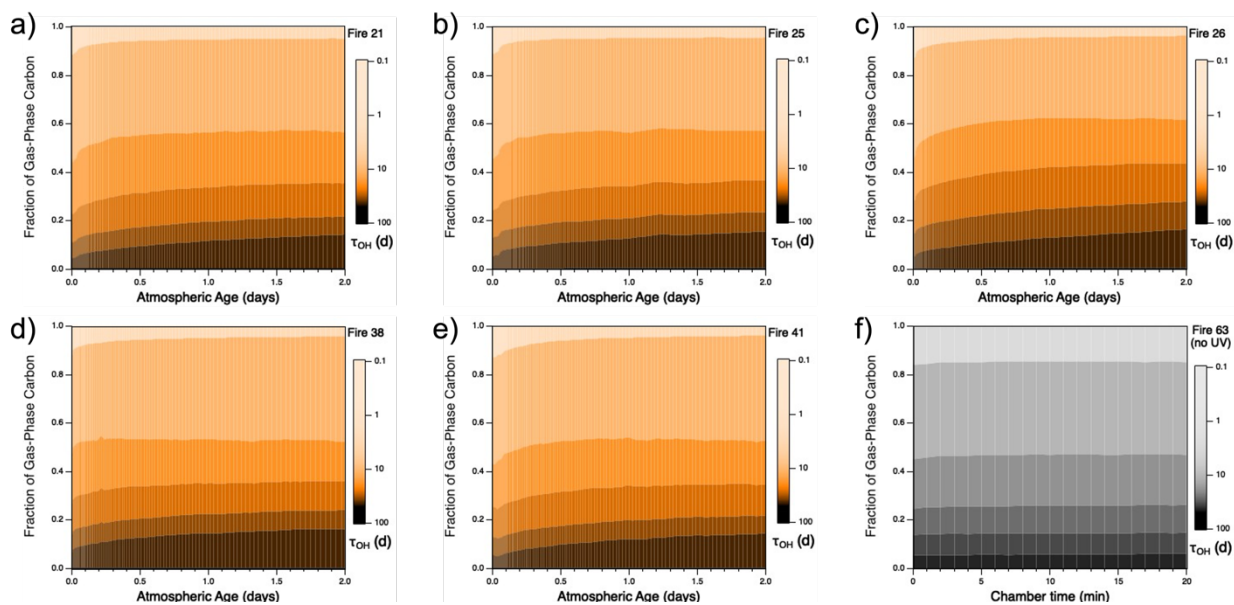

85  
 86 **Figure S6.** Time-evolving distribution of average oxidative lifetime ( $\overline{\tau_{OH}}$ ) for gas-phase BB emissions from each of  
 87 the different fuels as a function of atmospheric age (or chamber time for the blank): (a) Fire 21 / Lodgepole Pine, litter,  
 88 (b) Fire 25 / Engelmann Spruce, canopy, (c) Fire 26 / Engelmann Spruce, duff, (d) Fire 38 / Ponderosa Pine, litter, (e)  
 89 Fire 41 / Lodgepole Pine, litter, and (f) Fire 63 / blank – no UV – for Lodgepole Pine, litter. Gas-phase data represented  
 90 includes both PTR-MS and I-CIMS measurements, except for Fire 63, for which I-CIMS data is unavailable.  
 91

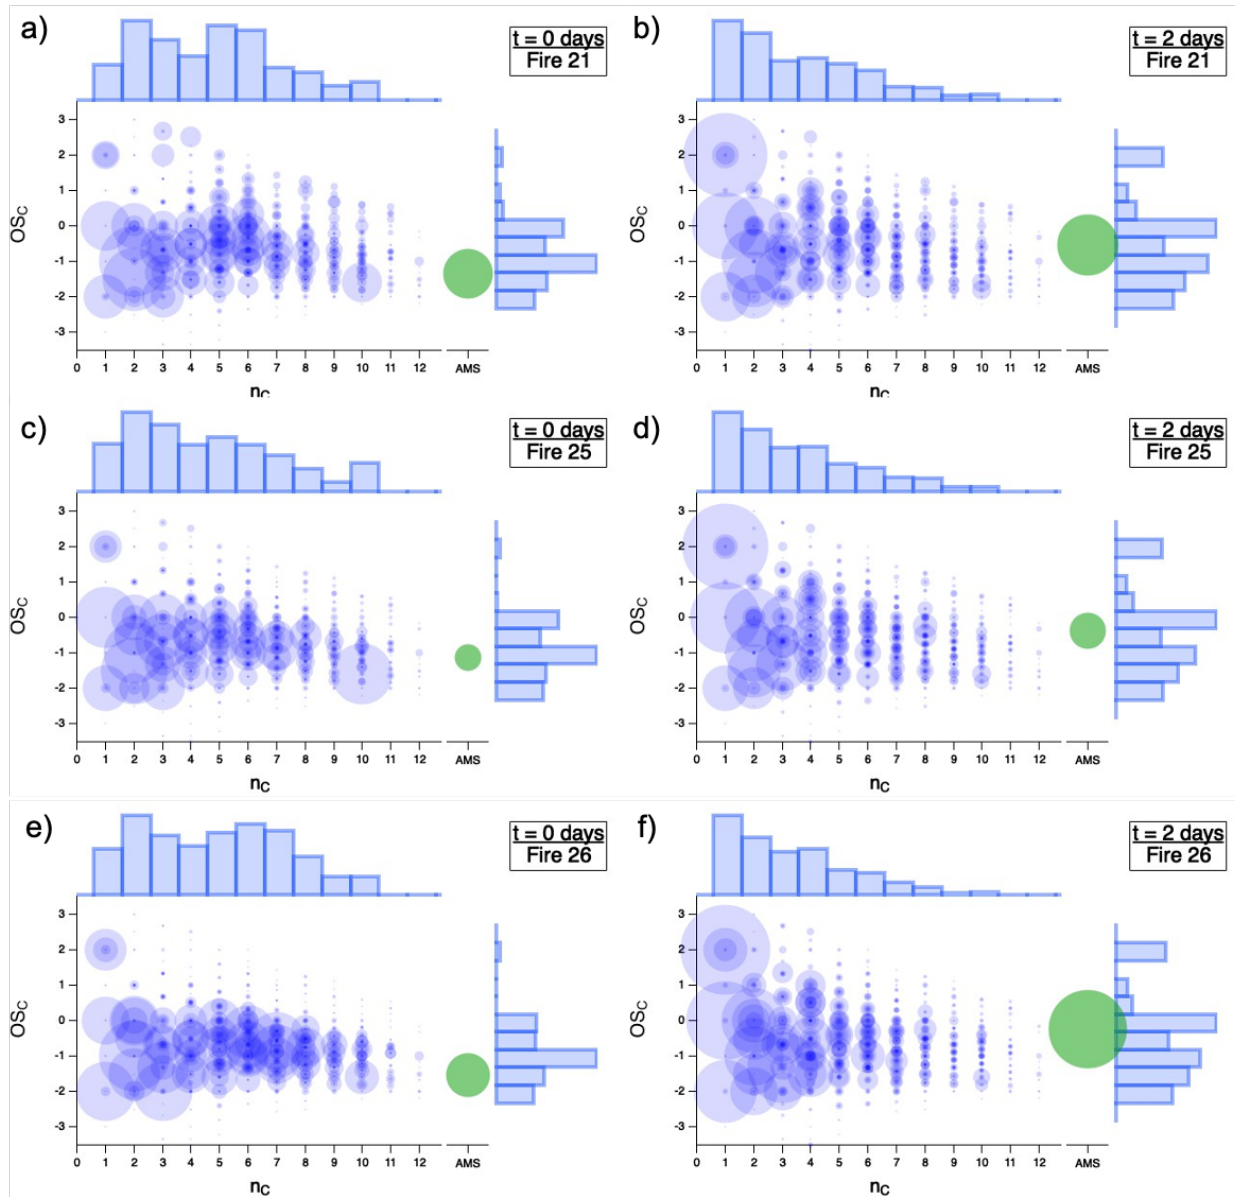



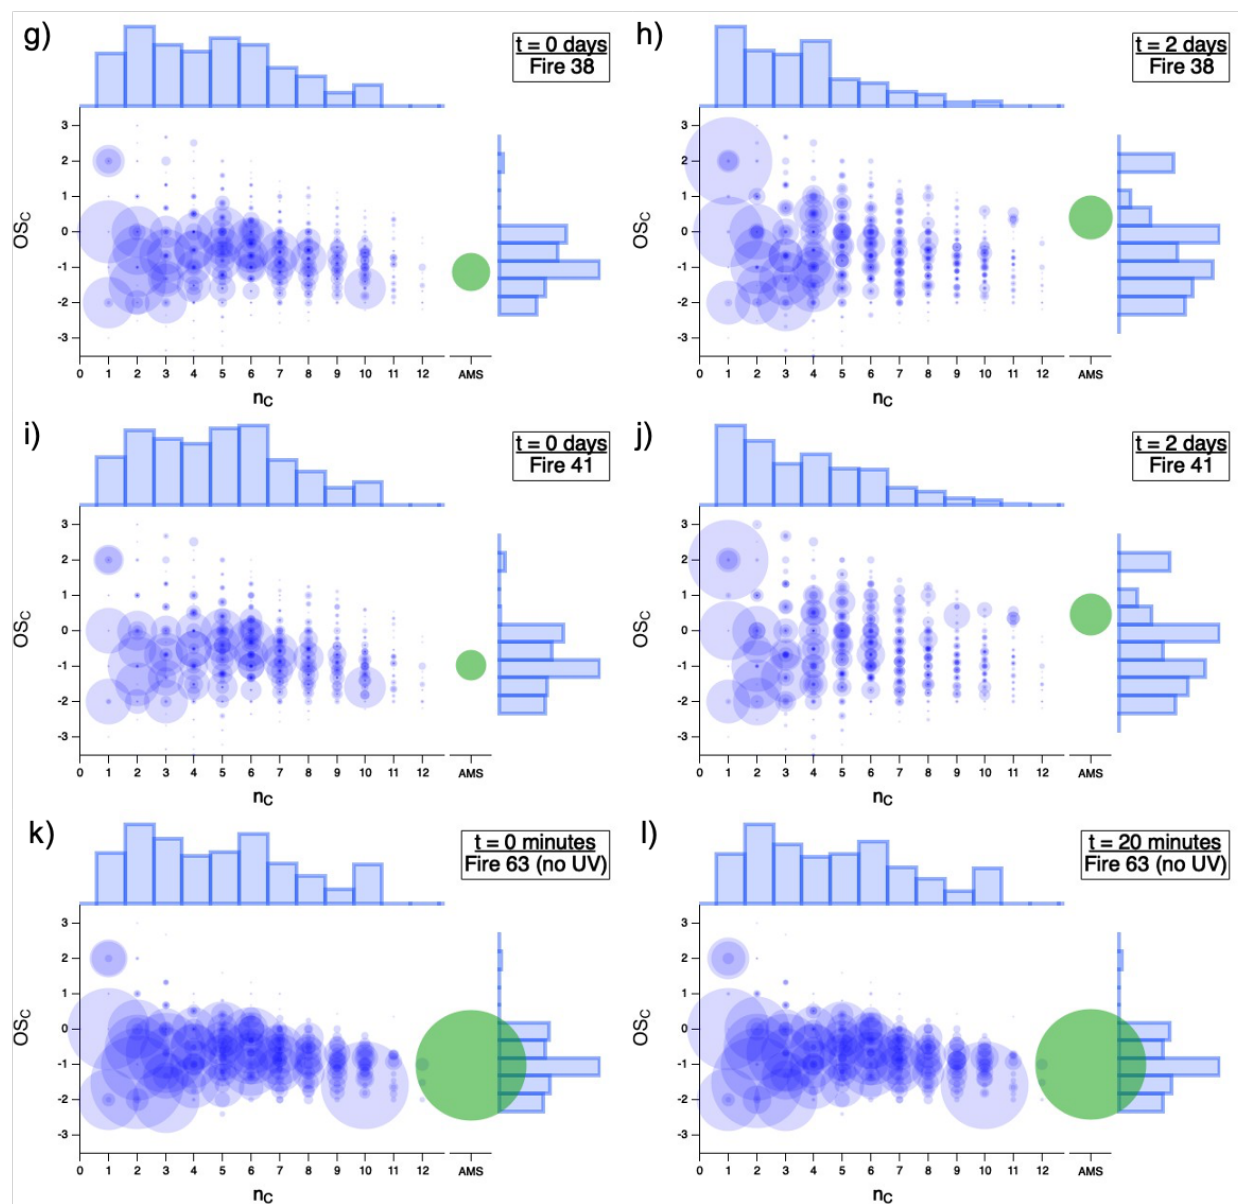

93  
 94 **Figure S7.** Carbon oxidation state ( $\overline{OS}_C$ ) vs. carbon number ( $n_C$ ) for gas-phase emissions across all fuels studied in  
 95 this work: (a)-(b) Fire 21 / Lodgepole Pine, litter, (c)-(d) Fire 25 / Engelmann Spruce, canopy, (e)-(f) Fire 26 /  
 96 Engelmann Spruce, duff, (g)-(h) Fire 38 / Ponderosa Pine, litter, (i)-(j) Fire 41 / Lodgepole Pine, litter, (k)-(l) Fire 63  
 97 / blank – no UV – for Lodgepole Pine, litter. Panels on the left represent freshly sampled emissions, and panels on  
 98 the right show the product distribution after two days of atmosphere-equivalent oxidation (or 20 minutes of chamber  
 99 time for Fire 63, the blank run). Marker area represents carbon-weighted concentration (ppbC), normalized to total  
 100 carbon concentration for comparison between fuels. The separate green marker shows  $\overline{OS}_C$  and relative concentration  
 101 for particle-phase measurements; the area scaling is unique from the scaling of the gas-phase data. Histograms along  
 102 the top and right axes show  $\overline{OS}_C$  and  $n_C$  distributions of the gas-phase products. Gas-phase data represented includes  
 103 both PTR-MS and I-CIMS measurements, except for Fire 63, for which I-CIMS data is unavailable.

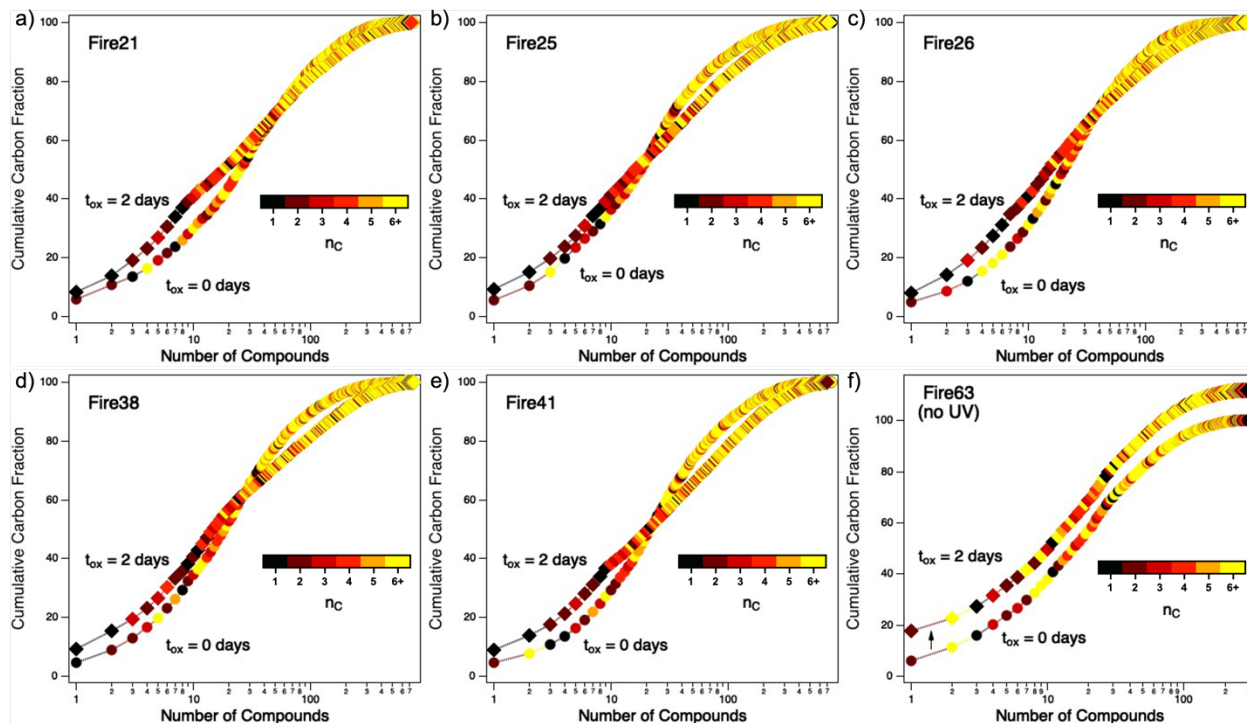

104  
 105 **Figure S8.** Cumulative distribution functions (CDF) showing the number of gas-phase compounds that constitute the  
 106 fraction of total carbon for each individual fire for “fresh” emissions (circles) and after two days of atmosphere-  
 107 equivalent aging (diamonds). Points within individual CDFs are colored by carbon number. (a) Fire 21 / Lodgepole  
 108 Pine, litter, (b) Fire 25 / Engelmann Spruce, canopy, (c) Fire 26 / Engelmann Spruce, duff, (d) Fire 38 / Ponderosa  
 109 Pine, litter, (e) Fire 41 / Lodgepole Pine, litter, and (f) Fire 63 / blank – no UV – for Lodgepole Pine, litter (note the  
 110 vertical offset of the  $t_{\text{ox}} = 2$  days trace to separate it from the otherwise overlapping “fresh” emissions trace).  
 111

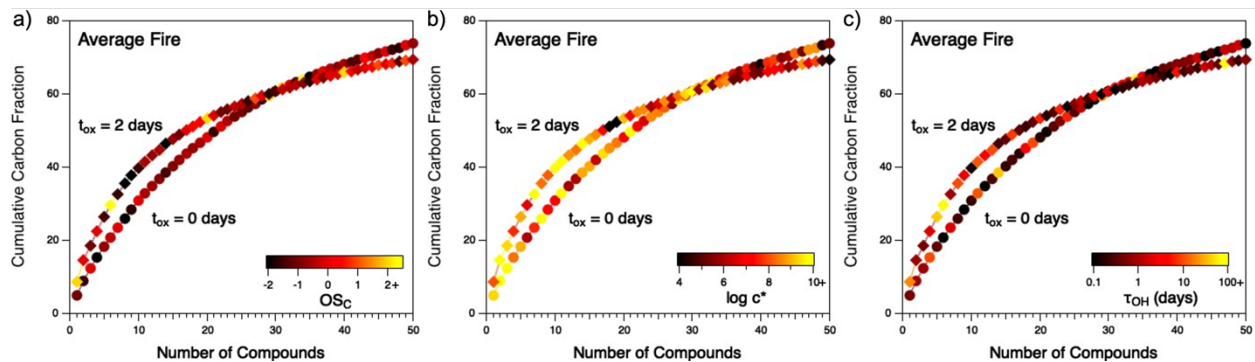

112  
 113 **Figure S9.** Cumulative distribution functions (CDFs) showing the percentage of gas-phase carbon for all measured  
 114 compounds in the “average fire” for “fresh” emissions (circles) and after two days of atmosphere-equivalent aging  
 115 (squares). Points within individual CDFs represent individual gas-phase compounds and are colored by (a) carbon  
 116 oxidation state ( $\overline{OS}_C$ ), (b) average vapor pressure ( $\log c^*$ ), and (c) average oxidative lifetime ( $\overline{\tau}_{OH}$ ).  
 117

118 These cumulative distribution functions (CDFs) represent the total fraction of gas-phase carbon in the system as a  
 119 function of number of compounds, and are arranged such that compounds are added from highest to lowest  
 120 concentrations within the reaction mixture.  
 121

| Ion m/z (amu) | Ion Formula                                                                | Compound       | $k_{OH}$ (cm <sup>3</sup> molec <sup>-1</sup> s <sup>-1</sup> ) | $c^*$ (μg/m <sup>3</sup> ) | $\overline{OS}_c$ |
|---------------|----------------------------------------------------------------------------|----------------|-----------------------------------------------------------------|----------------------------|-------------------|
| 194           | C <sub>4</sub> H <sub>5</sub> NI <sup>-</sup>                              | Pyrrole        | $2.3 \times 10^{-11}$                                           | $1.6 \times 10^{13}$       | -2.50             |
| 201           | C <sub>3</sub> H <sub>6</sub> O <sub>2</sub> I <sup>-</sup>                | Propionic acid | $2.7 \times 10^{-11}$                                           | $1.7 \times 10^7$          | -0.67             |
| 215           | C <sub>4</sub> H <sub>8</sub> O <sub>2</sub> I <sup>-</sup>                | Butyric acid   | $1.9 \times 10^{-11}$                                           | $6.2 \times 10^6$          | -1.00             |
| 231           | C <sub>3</sub> H <sub>4</sub> O <sub>4</sub> I <sup>-</sup>                | Malonic acid   | $5.3 \times 10^{-11}$                                           | $1.2 \times 10^4$          | 1.33              |
| 235           | C <sub>7</sub> H <sub>8</sub> OI <sup>-</sup>                              | Cresol         | $3.4 \times 10^{-11}$                                           | $3.9 \times 10^{11}$       | -0.86             |
| 237           | C <sub>6</sub> H <sub>6</sub> O <sub>2</sub> I <sup>-</sup>                | Catechol       | $5.3 \times 10^{-11}$                                           | $6.3 \times 10^9$          | -0.33             |
| 239           | C <sub>5</sub> H <sub>4</sub> O <sub>3</sub> I <sup>-</sup>                | Furoic acid    | $2.5 \times 10^{-11}$                                           | $1.0 \times 10^8$          | 0.40              |
| 251           | C <sub>7</sub> H <sub>8</sub> O <sub>2</sub> I <sup>-</sup>                | Methylcatechol | $2.9 \times 10^{-11}$                                           | $2.3 \times 10^9$          | -0.57             |
| 266           | C <sub>6</sub> H <sub>5</sub> NO <sub>3</sub> I <sup>-</sup>               | Nitrophenol    | $4.5 \times 10^{-11}$                                           | $1.7 \times 10^8$          | -0.67             |
| 282           | C <sub>6</sub> H <sub>5</sub> NO <sub>4</sub>                              | Nitrocatechol  | $3.7 \times 10^{-11}$                                           | $9.8 \times 10^5$          | -0.33             |
| 289           | C <sub>6</sub> H <sub>10</sub> O <sub>5</sub> I <sup>-</sup>               | Levoglucofan   | $2.0 \times 10^{-11}$                                           | 3.3                        | 0.00              |
| 311           | C <sub>6</sub> H <sub>4</sub> N <sub>2</sub> O <sub>5</sub> I <sup>-</sup> | Dinitrophenol  | $4.8 \times 10^{-12}$                                           | $2.6 \times 10^4$          | -0.67             |

122  
123  
124  
125

**Table S1.** Complete list of identified compounds detected by the I-CIMS, including ion masses, formulas,  $k_{OH}$  (calculated by structure-activity relationships following (Donahue et al., 2013)),  $c^*$ , and average carbon oxidation state. For a similar list for compounds detected by the PTR, see (Koss et al., 2018).

126

| (a)  | 21 | 25   | 26   | 38   | 41   | 63   | Avg. |
|------|----|------|------|------|------|------|------|
| 21   | 0  | 0.91 | 0.88 | 0.93 | 0.95 | 0.90 | 0.97 |
| 25   |    | 0    | 0.84 | 0.92 | 0.91 | 0.96 | 0.95 |
| 26   |    |      | 0    | 0.89 | 0.94 | 0.85 | 0.94 |
| 38   |    |      |      | 0    | 0.97 | 0.93 | 0.98 |
| 41   |    |      |      |      | 0    | 0.92 | 0.99 |
| 63   |    |      |      |      |      | 0    | 0.95 |
| Avg. |    |      |      |      |      |      | 0    |

127

| (b)  | 21 | 25   | 26   | 38   | 41   | 63   | Avg. |
|------|----|------|------|------|------|------|------|
| 21   | 0  | 0.98 | 0.96 | 0.92 | 0.98 | 0.64 | 0.99 |
| 25   |    | 0    | 0.96 | 0.94 | 0.97 | 0.63 | 0.99 |
| 26   |    |      | 0    | 0.94 | 0.95 | 0.62 | 0.98 |
| 38   |    |      |      | 0    | 0.94 | 0.56 | 0.97 |
| 41   |    |      |      |      | 0    | 0.60 | 0.99 |
| 63   |    |      |      |      |      | 0    | 0.64 |
| Avg. |    |      |      |      |      |      | 0    |

128

129

130

131

132

| (c)  | 21 | 25    | 26    | 38    | 41    | 63    | Avg.  |
|------|----|-------|-------|-------|-------|-------|-------|
| 21   | 0  | +0.07 | +0.08 | -0.01 | +0.03 | -0.26 | +0.02 |
| 25   |    | 0     | +0.12 | +0.02 | +0.03 | -0.33 | +0.04 |
| 26   |    |       | 0     | +0.05 | +0.01 | -0.23 | +0.04 |
| 38   |    |       |       | 0     | -0.03 | -0.37 | -0.01 |
| 41   |    |       |       |       | 0     | -0.32 | 0     |
| 63   |    |       |       |       |       | 0     | -0.31 |
| Avg. |    |       |       |       |       |       | 0     |

**Table S2.** Absolute values of cosine similarities between gas-phase mass spectra of pairs of fires, including the “average” fire, for (a) fresh emissions and (b) after 2 days oxidative aging (or 0 to 20 minutes of chamber time for Fire 63). The difference between these two tables is represented in panel (c).

| Atmospheric Age = 0 Days       |       |    |       | Atmospheric Age = 2 Days              |       |    |       |
|--------------------------------|-------|----|-------|---------------------------------------|-------|----|-------|
| Compound                       | Frac. | nC | OsC   | Compound                              | Frac. | nC | OsC   |
| Acetaldehyde                   | 4.9%  | 2  | -1    | Formic Acid                           | 8.6%  | 1  | 2     |
| Ethene                         | 4.7%  | 2  | -1.5  | Formaldehyde                          | 5.9%  | 1  | 0     |
| Formaldehyde                   | 3.9%  | 1  | 0     | Acetaldehyde                          | 4.0%  | 2  | -1    |
| Acrolein                       | 3.3%  | 3  | -0.67 | Acetic Acid                           | 4.0%  | 2  | 0     |
| Methanol                       | 3.0%  | 1  | -2    | Acetone                               | 3.8%  | 3  | -1.33 |
| Acetic Acid                    | 2.8%  | 2  | 0     | Isocyanic Acid                        | 3.1%  | 1  | 4     |
| Propene                        | 2.6%  | 3  | -2    | Ethene                                | 3.1%  | 2  | -1.5  |
| MethylFurfural/Benzenediol     | 2.2%  | 6  | -0.33 | Methanol                              | 2.9%  | 1  | -2    |
| Monoterpenes                   | 2.2%  | 10 | -1.6  | Ethanol                               | 2.4%  | 2  | -2    |
| Acetylene                      | 2.1%  | 2  | -0.5  | 1,3-Butadiene                         | 2.0%  | 4  | -1.5  |
| Acetone                        | 2.0%  | 3  | -1.33 | Acetylene                             | 1.7%  | 2  | -0.5  |
| Guaiacol                       | 1.8%  | 7  | -0.57 | Hydroxyacetone/Methylacetate          | 1.6%  | 3  | -0.67 |
| Furan                          | 1.8%  | 4  | -0.5  | 2,3-Butanedione                       | 1.6%  | 4  | -0.5  |
| Cresol                         | 1.8%  | 7  | -0.86 | Propene                               | 1.6%  | 3  | -2    |
| Methylfuran                    | 1.8%  | 5  | -0.8  | Acrolein                              | 1.3%  | 3  | -0.67 |
| Furfural                       | 1.7%  | 5  | 0     | Methylpropanoate                      | 1.3%  | 4  | -1    |
| Hydroxyacetone/Methylacetate   | 1.6%  | 3  | -0.67 | Methylglyoxal/Acrylic Acid            | 1.2%  | 3  | 0     |
| Phenol                         | 1.6%  | 6  | -0.67 | C4H6O4                                | 1.0%  | 4  | 0.5   |
| 1,3-Butadiene                  | 1.6%  | 4  | -1.5  | Dihydrofuran-dione/Succinic Anhydride | 1.0%  | 4  | 0.5   |
| 2,3-Butanedione                | 1.6%  | 4  | -0.5  | Hydrogen Cyanide                      | 1.0%  | 1  | 2     |
| Furanone/Unsaturated Carbonyls | 1.5%  | 4  | 0     |                                       |       |    |       |
| Methylglyoxal/Acrylic Acid     | 1.4%  | 3  | 0     |                                       |       |    |       |
| Benzene                        | 1.4%  | 6  | -1    |                                       |       |    |       |
| 2-Methanolfuran                | 1.4%  | 5  | -0.4  |                                       |       |    |       |
| Formic Acid                    | 1.3%  | 1  | 2     |                                       |       |    |       |
| MVK/MACR                       | 1.3%  | 4  | -1    |                                       |       |    |       |
| Toluene                        | 1.2%  | 7  | -1.14 |                                       |       |    |       |
| Isoprene                       | 1.1%  | 5  | -1.6  |                                       |       |    |       |
| Methylguaiacol                 | 1.1%  | 8  | -0.75 |                                       |       |    |       |
| Hydrogen Cyanide               | 1.0%  | 1  | 2     |                                       |       |    |       |
| Dimethylfuran                  | 1.0%  | 6  | -1    |                                       |       |    |       |

133  
134 **Table S3.** List of gas-phase compounds that constitute  $\geq 1.0\%$  of carbon concentration in the reaction mixture for the  
135 “average fire” before (left) and after (right) two days of atmosphere-equivalent oxidation. Compound name, fraction  
136 of total gas-phase concentration, carbon number, and average carbon oxidation state are listed for each compound.  
137 Arrows indicate change in concentration after aging, with red arrows representing a decrease, blue arrows representing  
138 an increase, and black arrows representing no change. While gas-phase data in this work are measured by both the  
139 PTR and I-CIMS, all compounds contributing  $\geq 1.0\%$  of carbon concentration to the mixture were detected by the  
140 PTR.  
141

142 **References**

- 143
- 144 Daumit, K. E., Kessler, S. H., and Kroll, J. H.: Average chemical properties and potential formation pathways of  
145 highly oxidized organic aerosol, *Faraday Discuss.*, 165, 181, <https://doi.org/10.1039/c3fd00045a>, 2013.
- 146
- 147 Donahue, N. M., Chuang, W., Epstein, S. A., Kroll, J. H., Worsnop, D. R., Robinson, A. L., Adams, P. J., and  
148 Pandis, S. N.: Why do organic aerosols exist? Understanding aerosol lifetimes using the two-dimensional volatility  
149 basis set, *Environ. Chem.*, 10, 151–157, <https://doi.org/10.1071/EN13022>, 2013.
- 150
- 151 Isaacman-VanWertz, G., Massoli, P., O'Brien, R., Lim, C. Y., Franklin, J. P., Moss, J. A., Hunter, J. F., Nowak, J.  
152 B., Canagaratna, M. R., Misztal, P. K., Arata, C., Roscioli, J. R., Herndon, S. T., Onasch, T. B., Lambe, A. T.,  
153 Jayne, J. T., Su, L., Knopf, D. A., Goldstein, A. H., Worsnop, D. R., and Kroll, J. H.: Chemical evolution of  
154 atmospheric organic carbon over multiple generations of oxidation, *Nat. Chem.*, 10, 1–7,  
155 <https://doi.org/10.1038/s41557-018-0002-2>, 2018.
- 156
- 157 Koss, A. R., Sekimoto, K., Gilman, J. B., Selimovic, V., and Coggon, M. M.: Non-methane organic gas emissions  
158 from biomass burning: identification, quantification, and emission factors from PTR-ToF during the FIREX 2016  
159 laboratory experiment, *Atmos. Chem. Phys.*, 18, 3299–3319, 2018.
- 160
